# Supplementary material for: The β-PdBi2monolayer for efficient electrocatalytic NO reduction to NH3: a computational study
Source: Royal Society of Chemistry journal article supplement (doi:10.1039/d3qi00225j), 2023-01-01
Supplement: d3qi00225j1.pdf [file d3qi00225j1.pdf]

## Electronic Supporting Information

### **$\beta$ -PdBi<sub>2</sub> Monolayer for Efficient Electrocatalytic NO Reduction to NH<sub>3</sub>: A Computational Study**

Yuting Sun,<sup>a</sup> Zhongxu Wang,<sup>a</sup> Yuejie Liu,<sup>b,\*</sup> Qinghai Cai,<sup>a,c</sup> Jingxiang Zhao <sup>a,\*</sup>

<sup>a</sup> *College of Chemistry and Chemical Engineering, Key Laboratory of Photonic and Electronic Bandgap Materials, Ministry of Education, Harbin Normal University, Harbin 150025, Heilongjiang, China*

<sup>b</sup> *Modern Experiment Center, Harbin Normal University, Harbin, 150025, China*

<sup>c</sup> *Heilongjiang Province Collaborative Innovation Center of Cold Region Ecological Safety, Harbin 150025, China*

\* To whom correspondence should be addressed. Email: liuyuejie@hrbnu.edu.cn (Y. Liu); zhaojingxiang@hrbnu.edu.cn (J. Zhao)

## COMPUTATIONAL DETAILS

The  $\Delta G$  value can be obtained by the formula:  $\Delta G = \Delta E + \Delta ZPE - T\Delta S + \Delta G_{pH} + eU$ , where  $\Delta E$  is the reaction energy of reactant and product species adsorbed on the catalyst directly obtained from DFT computations;  $\Delta ZPE$  and  $\Delta S$  are the changes between the adsorbed species and the gas phase molecules in zero-point energies and entropy at 298.15 K, which can be calculated from the vibrational frequencies. In the CHE model,  $\Delta G_{pH}$  is the free energy correction of  $pH$ , and can be calculated by:  $\Delta G_{pH} = K_B T \times pH \times \ln 10$ . Notably, the  $pH$  value was set to be zero in this work for simplicity;  $U$  was the applied potential.

According to the obtained free energy change of each elementary step, the limiting potential ( $U_L$ ) was further computed as follows:  $U_L = -\max(\Delta G_1, \Delta G_2, \Delta G_3, \Delta G_4, \dots, \Delta G_i)/e$ .

**Constant-Potential Calculations** In the constant-potential calculations, in order to elucidate the reaction mechanism at different electrode potentials, the excess charge per unit cell ( $\Delta n$ ) from  $-2.0 e^-$  to  $+2.0 e^-$  with a step size of  $0.5 e^-$  was added. A reference value of 4.6 eV was adopted for the standard hydrogen electrode (SHE).

The potential-dependent energy can be calculated by:

$$E = E_{DFT} - \Delta n(V_{sol} + \varphi_q/e)$$

where  $E_{DFT}$  is the DFT-calculated energy,  $V_{sol}$  is the electrostatic potential of the bulk

electrolyte, and  $-\varphi_q$  is the work function of the charged system.

The relation between  $\varphi_q$  and the corresponding electrode potential referenced to the standard hydrogen electrode (SHE) scale is calculated by:

$$U_q(U/SHE) = -4.6V - \varphi_{q/e}$$

The E-U<sub>q</sub> quadratic form could be written as:

$$E(U_q) = -\frac{1}{2}C(U_q - U_0)^2 + E_0$$

where  $U_0$ ,  $C$ , and  $E_0$  are the fitted values of the potential of zero charge (PZC), capacitance of the corresponding system, and the energy of the system at the PZC, respectively.

Fixed potential, the potential reference to the SHE scale changes by changing the pH value, which could be calculated by:

$$U_{RHE} = U_{SHE} + 0.0592 \times pH$$

**The dissolution potentials** To evaluate the stability of  $\beta$ -PdBi<sub>2</sub> monolayer in strong acidic media, we computed the dissolution potentials ( $U_{diss}$ , in V) of Bi in  $\beta$ -PdBi<sub>2</sub> monolayer at pH = 0, which was defined as:  $U_{diss} = U_{Bi}^0 + [E_{Bi,bulk} - (E_{\beta-PdBi_2} - E_{d-\beta-PdBi_2})]/ne$ , where  $U_{Bi}^0$  is the standard dissolution potential of Bi in the bulk form,  $d-\beta$ -PdBi<sub>2</sub> is the defective  $\beta$ -PdBi<sub>2</sub> monolayer by dissolving (removing) one Bi to solutions and  $n$  is the coefficient for the aqueous dissolution reaction:  $Bi + H^+ \leftrightarrow Bi^+ + 1/2H_2$ , namely,  $n$  equals to 1.

**Table S1.** The computed free energy changes ( $\Delta G$ , eV) of each possible elementary step for NORR to generate  $\text{NH}_3$  product on  $\beta\text{-PdBi}_2$  monolayer. The mared red step represent its higher selectivity.

| Elementary step                                                                          | Free energy change ( $\Delta G$ ) |
|------------------------------------------------------------------------------------------|-----------------------------------|
| $\text{NO (g)} + * \rightarrow * \text{NO}$                                              | -0.24                             |
| $* \text{NO} + \text{H}^+ + \text{e}^- \rightarrow * \text{NHO}$                         | 0.35                              |
| $* \text{NO} + \text{H}^+ + \text{e}^- \rightarrow * \text{NOH}$                         | 0.74                              |
| $* \text{NHO} + \text{H}^+ + \text{e}^- \rightarrow * \text{NH}_2\text{O}$               | -0.54                             |
| $* \text{NHO} + \text{H}^+ + \text{e}^- \rightarrow * \text{NHOH}$                       | -0.04                             |
| $* \text{NH}_2\text{O} + \text{H}^+ + \text{e}^- \rightarrow * \text{NH}_3 + * \text{O}$ | -1.73                             |
| $* \text{NH}_2\text{O} + \text{H}^+ + \text{e}^- \rightarrow * \text{NH}_2\text{OH}$     | 0.13                              |
| $* \text{O} + \text{H}^+ + \text{e}^- \rightarrow * \text{OH}$                           | -0.62                             |
| $* \text{OH} + \text{H}^+ + \text{e}^- \rightarrow \text{H}_2\text{O} + *$               | -0.64                             |

**Table S2.** The quadratic relation between the energy (E) of the reaction intermediates and dependence of applied electrochemical potential U.

| <b>Reaction intermediates</b> | <b>Energy (E)</b>               | <b>R<sup>2</sup></b> |
|-------------------------------|---------------------------------|----------------------|
| *                             | $E = -1.60U^2 - 4.42U - 227.96$ | 0.99                 |
| *NO                           | $E = -1.43U^2 - 3.71U - 240.64$ | 0.99                 |
| *NHO                          | $E = -1.39U^2 - 3.67U - 244.08$ | 0.99                 |
| *NH <sub>2</sub> O            | $E = -1.66U^2 - 4.48U - 248.99$ | 0.99                 |
| *O                            | $E = -1.29U^2 - 3.28U - 233.43$ | 0.99                 |
| *OH                           | $E = -1.72U^2 - 4.48U - 238.45$ | 0.99                 |

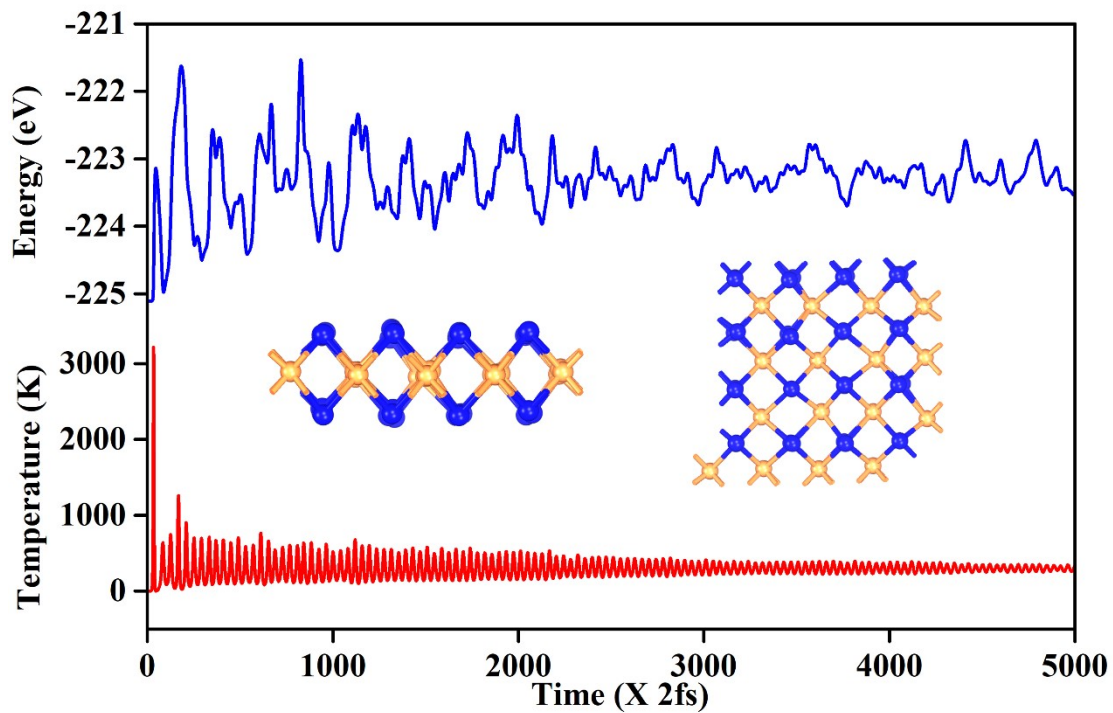

**Fig. S1.** Variations of temperature and energy as a function of the time for AIMD simulations of  $\beta$ -PdBi<sub>2</sub> monolayer; insert are top and side views of the snapshot of atomic configuration. The simulation is run under 500 K for 10 ps with a time step of 2 fs. Blue and orange spheres represent the Bi and Pd atoms, respectively.

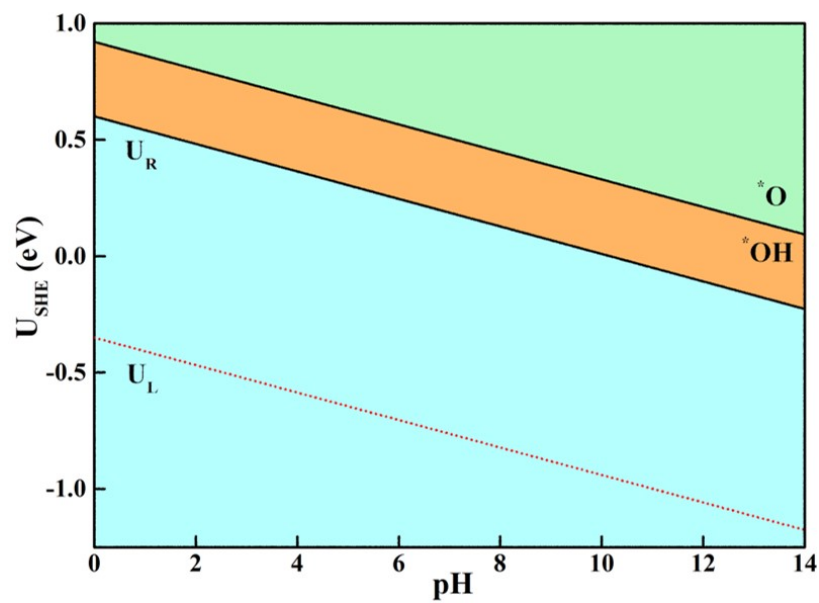

**Fig. S2.** The surface Pourbaix diagrams of  $\beta$ -PdBi<sub>2</sub> monolayer.

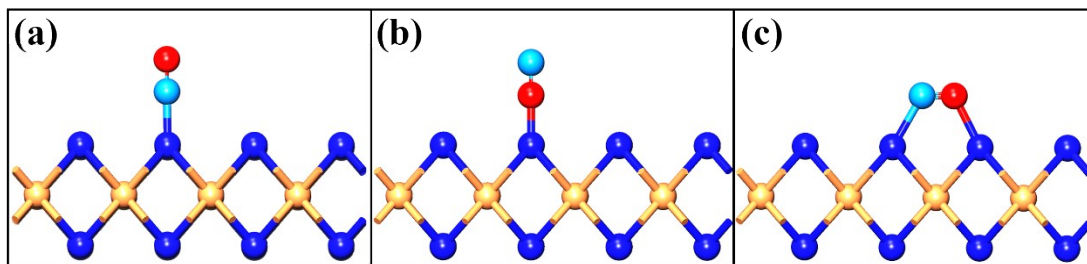

**Fig. S3.** NO were adsorbed on  $\beta$ -PdBi<sub>2</sub> monolayer via the (a) N-end, (b) O-end, and (c) side-on patterns.



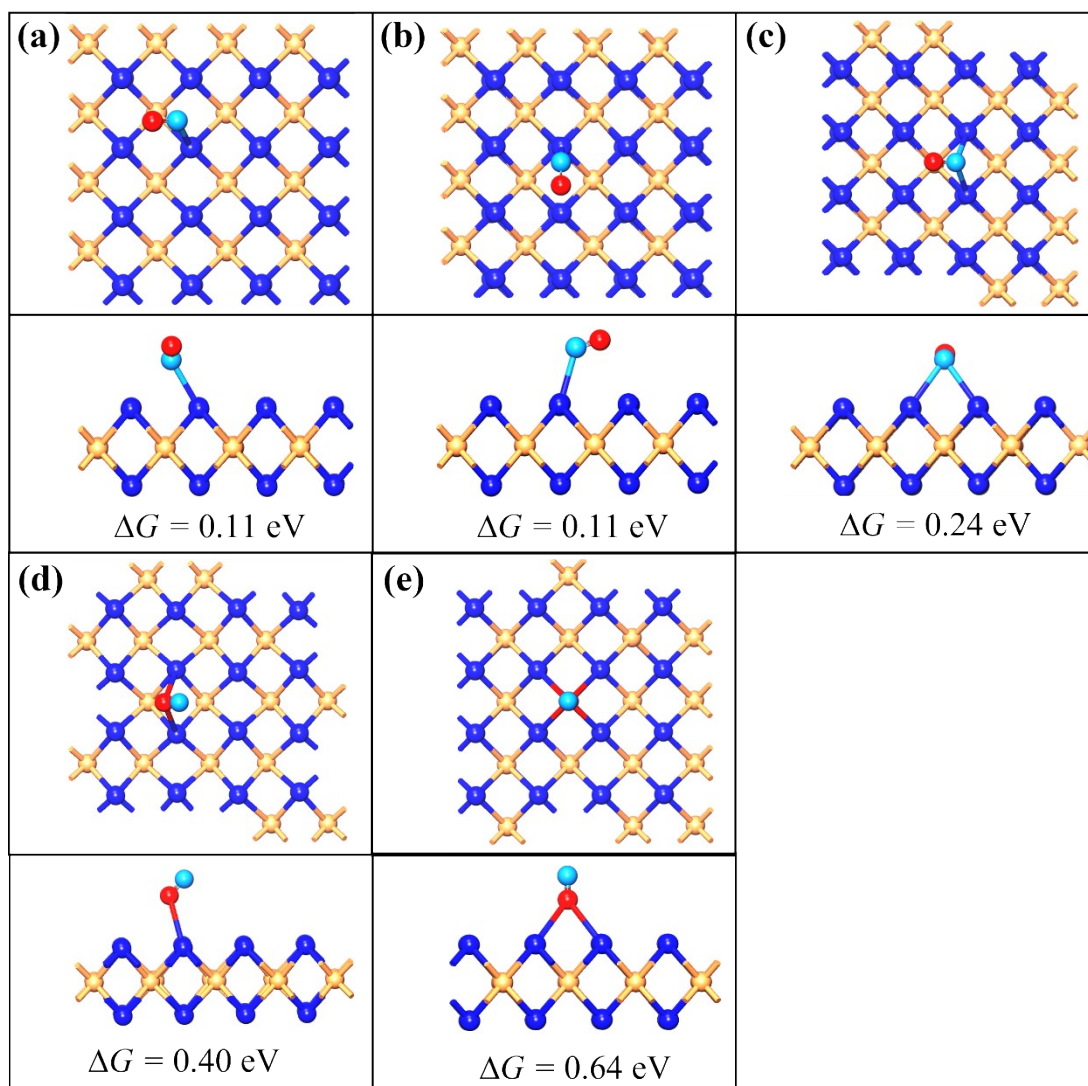

**Fig. S4.** The optimized configuration of (a) NO adsorbed on the Bi-top position via the N-end pattern. (b) and (c) two possible Bi-Bi bridge sites was obtained. (d) and (e) the bridge and hollow sites for the O-end pattern.

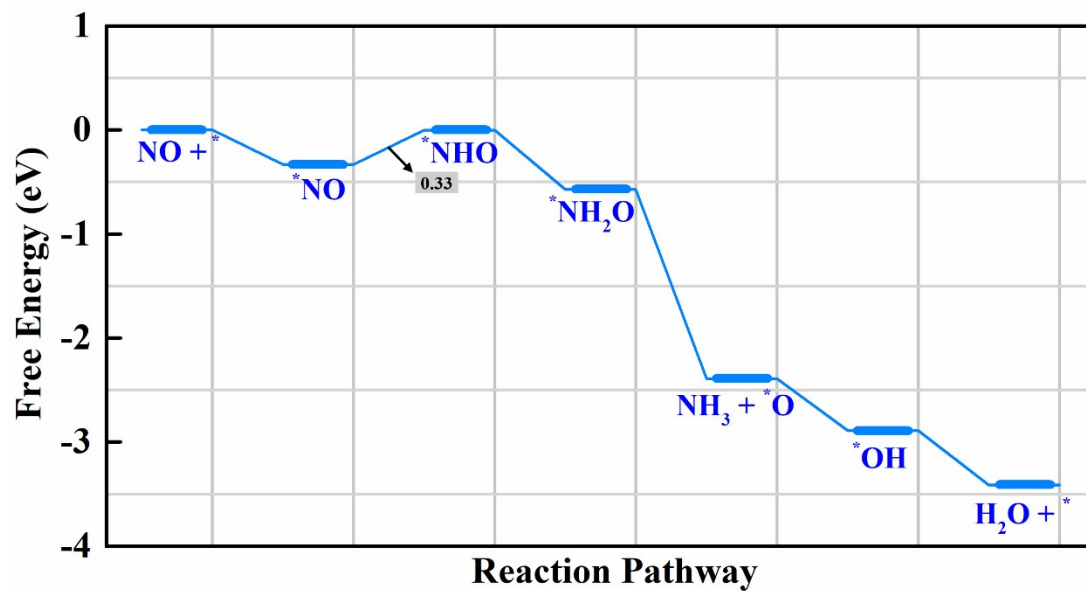

Fig. S5. The effect of aqueous solution on the catalytic activity of  $\beta$ -PdBi<sub>2</sub> for NO-to-NH<sub>3</sub> conversion.

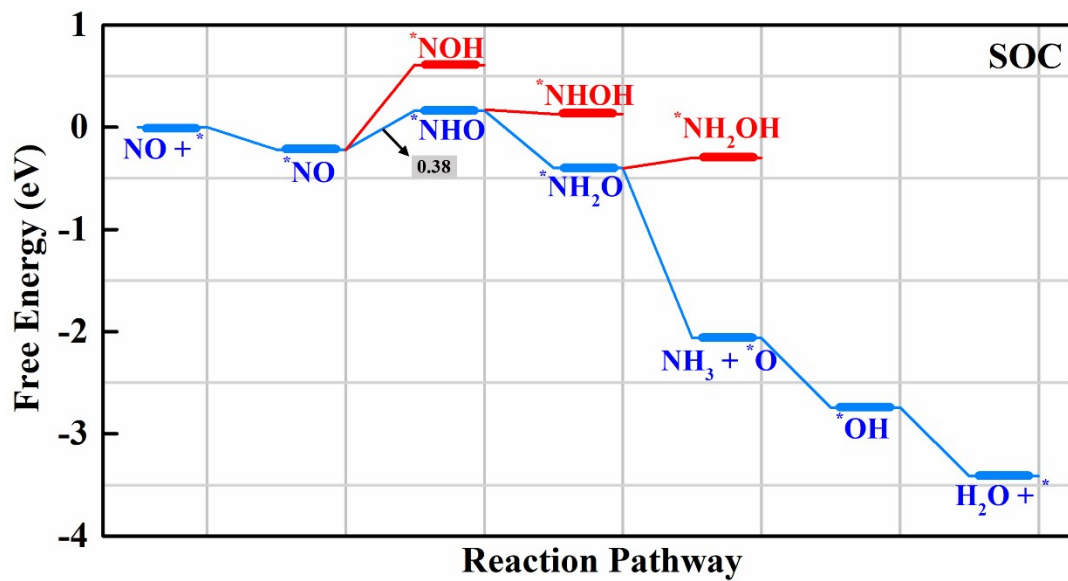

**Fig. S6.** The effect of SOC on the catalytic activity of  $\beta$ -PdBi<sub>2</sub> for NO-to-NH<sub>3</sub> conversion.

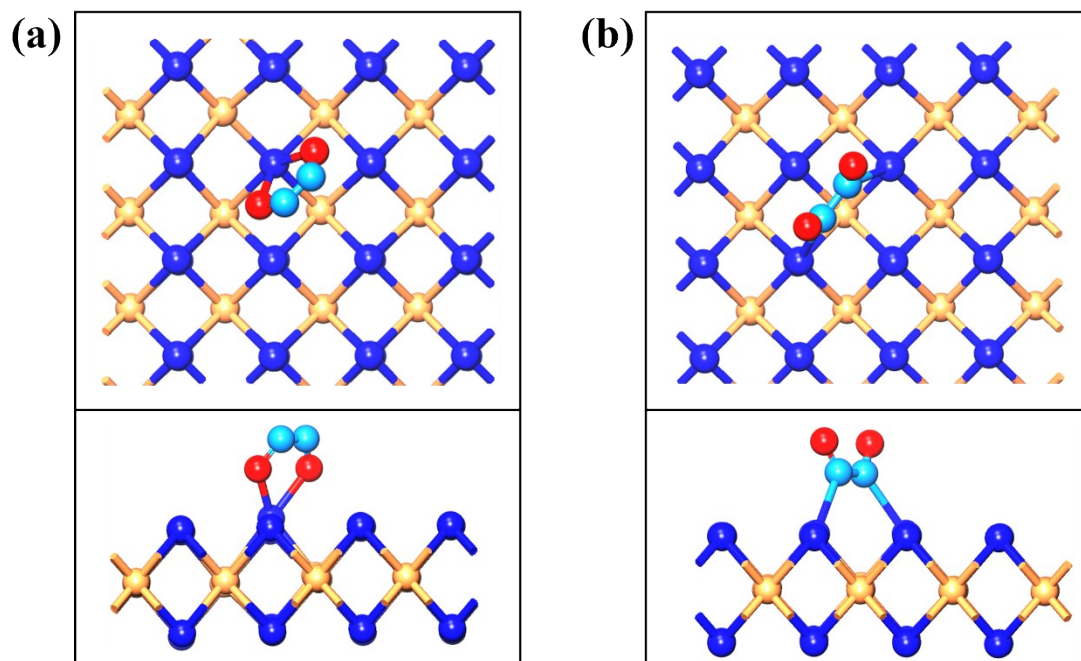

**Fig. S7.** The obtained  $^*N_2O_2$  stable configurations on  $\beta$ -PdBi<sub>2</sub> monolayer via (a) O-end and (b) N-end patterns.

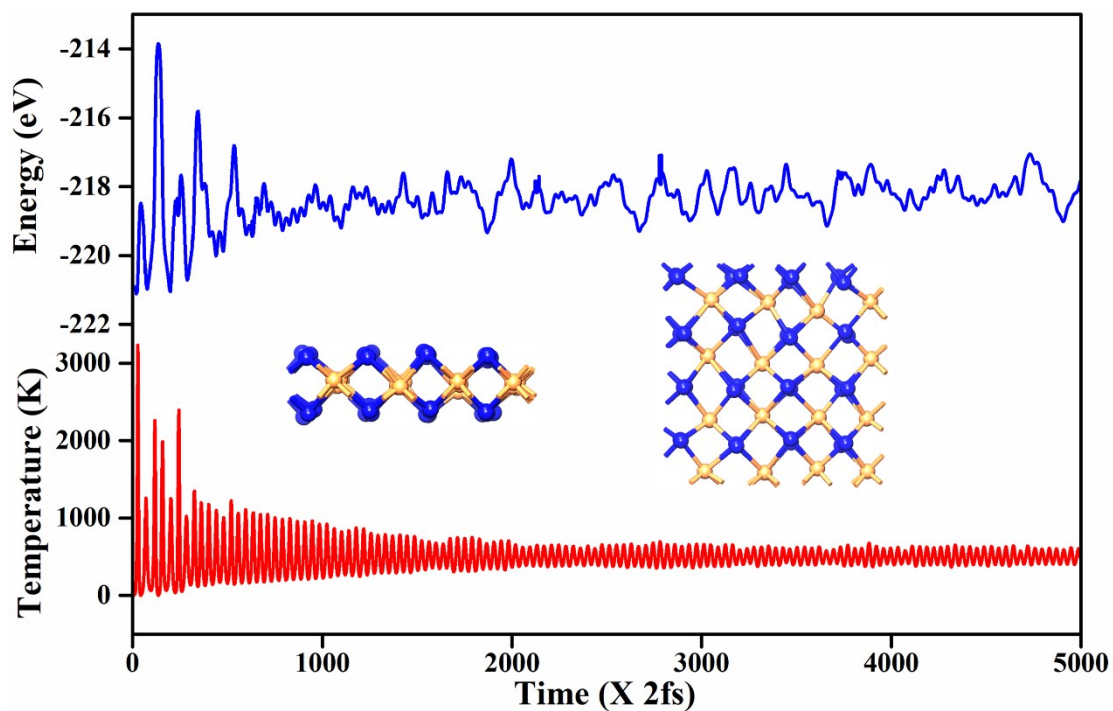

**Fig. S8.** Variations of temperature and energy as a function of the time for AIMD simulations of  $\beta$ -PdBi<sub>2</sub> monolayer under 7% tensile strain and the snapshots of atomic configuration. The simulation was run under 500 K for 10 ps with a time step of 2 fs. Blue and orange spheres represent the Bi and Pd atoms, respectively.

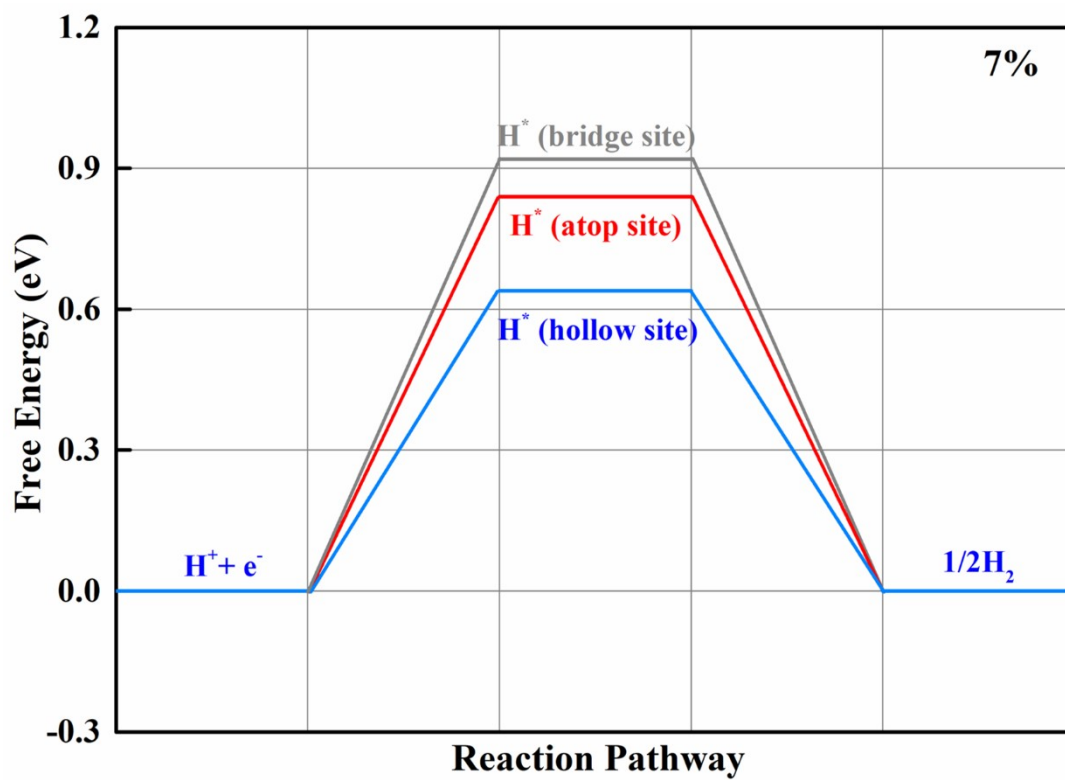

Fig. S9. The calculated Gibbs free profile of HER on  $\beta$ -PdBi<sub>2</sub> monolayer when a tensile strain of 7% was applied.

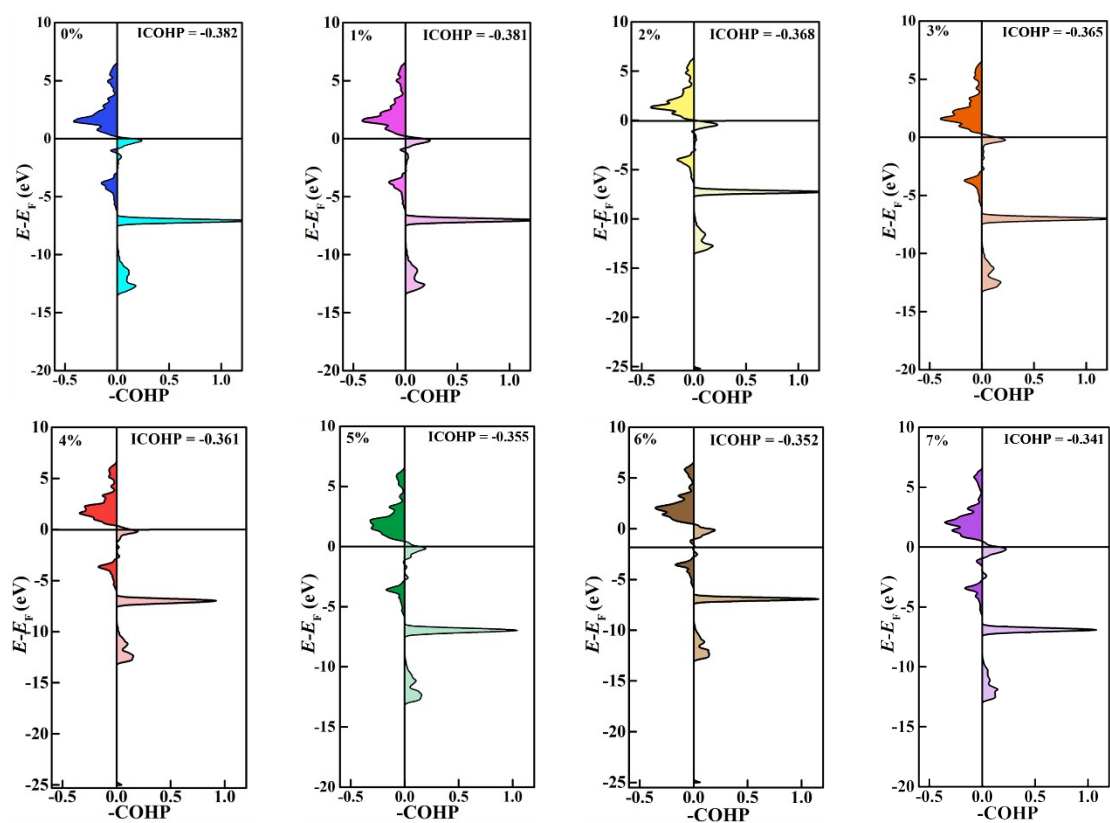

**Fig. S10.** The computed crystal orbital Hamilton population (COHP) between NO molecule and  $\beta$ -PdBi<sub>2</sub> monolayer under different tensile strain.
